# Supplementary material for: Hawthorn Juice Simulation System for Pectin and Polyphenol Adsorption Behavior: Kinetic Modeling Properties and Identification of the Interaction Mechanism
Source: MDPI journal article supplement (doi:10.3390/foods11182813), 2022-09-13
Supplement: s1 [file s1]

## **Supplementary Material**

### **Hawthorn Juice Simulation System for Pectin and Polyphenol Adsorption**

### **Behavior: Kinetic Modeling Properties and Identification of the Interaction**

### **Mechanism**

Xuan Zhang <sup>1</sup>, Meijiao Li <sup>1</sup>, Wen Zhao <sup>1,2</sup>, Zhe Gao <sup>1</sup>, Mengying Wu <sup>1</sup>, Tong Zhou <sup>1</sup>,  
Chen Wu <sup>1</sup>, Kaixuan Zhou <sup>1</sup>, Xue Han <sup>1</sup> and Qian Zhou <sup>1,2,\*</sup>

*1 College of Food Science and Technology, Hebei Agricultural University, Baoding  
071000, China*

*2 Engineering Technology Research Center for Agricultural Product Processing of  
Hebei, Baoding 071000, China*

*\* Correspondence: zhouqian@hebau.edu.cn (Q.Z.); Tel.: +86-031-27528195 (Q.Z.)*

Table S1. Preliminary characterization of HP

| Measurement index         | Regression equation  | R <sup>2</sup> | Result           |
|---------------------------|----------------------|----------------|------------------|
| Total sugar (%)           | $y = 0.004x + 0.046$ | 0.998          | $63.40 \pm 2.75$ |
| Methyl esterification (%) | -                    | -              | $54.95 \pm 1.90$ |
| Urionic acid (%)          | $y = 0.005x - 0.058$ | 0.995          | $57.81 \pm 1.01$ |
| Mw (KDa)                  | -                    | -              | $2120 \pm 59$    |

- indicates not detected.

Table S2. Analysis of HPLC results of HP

| Sugar             | Peak time (min) | Regression equation  | Correlation coefficient (R <sup>2</sup> ) | Content (µg/mg HP) |
|-------------------|-----------------|----------------------|-------------------------------------------|--------------------|
| Mannose           | 20.049          | Y= 66.815 X -15.062  | 0.9990                                    | 4.80 ± 0.51a       |
| Rhamnose          | 26.673          | Y=58.182X + 92.079   | 0.9997                                    | 0.24 ± 0.05a       |
| Galacturonic acid | 33.685          | Y= 64.367 X - 214.57 | 0.9925                                    | 29.32 ± 2.34b      |
| Glucose           | 40.944          | Y= 57.844X -180.87   | 0.9939                                    | 106.43 ± 4.44c     |
| Galactose         | 46.36           | Y= 69.468 X - 298.32 | 0.9954                                    | -                  |
| Arabinose         | 50.249          | Y=78.123X - 151.78   | 0.9978                                    | 10.50 ± 0.79a      |
| Fucose            | 57.217          | Y= 40.051 X +911.74  | 0.9899                                    | -                  |

- indicates not detected.

Different letters represent significant differences (P < 0.05).

Table S3. Parameters of different adsorption kinetic models

| Polyphenols     | Intragranular diffusion                                           |       | Pseudo-first order      |       | Pseudo-second order                      |                         |       |
|-----------------|-------------------------------------------------------------------|-------|-------------------------|-------|------------------------------------------|-------------------------|-------|
|                 | $K_p (\mu\text{g} \cdot (\text{mg} \cdot \text{min}^{0.5})^{-1})$ | $R^2$ | $K_1 (\text{min}^{-1})$ | $R^2$ | $Q_e (\mu\text{g} \cdot \text{mg}^{-1})$ | $K_2 (\text{min}^{-1})$ | $R^2$ |
| EC <sup>1</sup> | 0.018                                                             | 0.016 | 0.063                   | 0.793 | 75.188                                   | $3.258 \times 10^{-3}$  | 0.998 |
| CA <sup>2</sup> | 0.178                                                             | 0.705 | 0.037                   | 0.853 | 8.873                                    | $4.000 \times 10^{-3}$  | 0.975 |

<sup>1</sup>EC represents epicatechin.

<sup>2</sup>CA represents chlorogenic acid.

Table S4. Parameters of different adsorption isotherm models

| Polyphenols     | Langmuir isotherm model           |                    |       | Freundlich isotherm model |                   |       |
|-----------------|-----------------------------------|--------------------|-------|---------------------------|-------------------|-------|
|                 | $Q_m$ ( $\mu\text{g}/\text{mg}$ ) | $K_L$              | $R^2$ | $K_f$                     | $n$               | $R^2$ |
| EC <sup>1</sup> | $293.627 \pm 6.265$               | $0.014 \pm 0.0006$ | 0.999 | $7.872 \pm 0.410$         | $1.436 \pm 0.030$ | 0.998 |
| CA <sup>2</sup> | $23.710 \pm 3.440$                | $0.009 \pm 0.0002$ | 0.987 | $0.488 \pm 0.097$         | $1.454 \pm 0.106$ | 0.984 |

<sup>1</sup>EC represents epicatechin.

<sup>2</sup>CA represents chlorogenic acid.

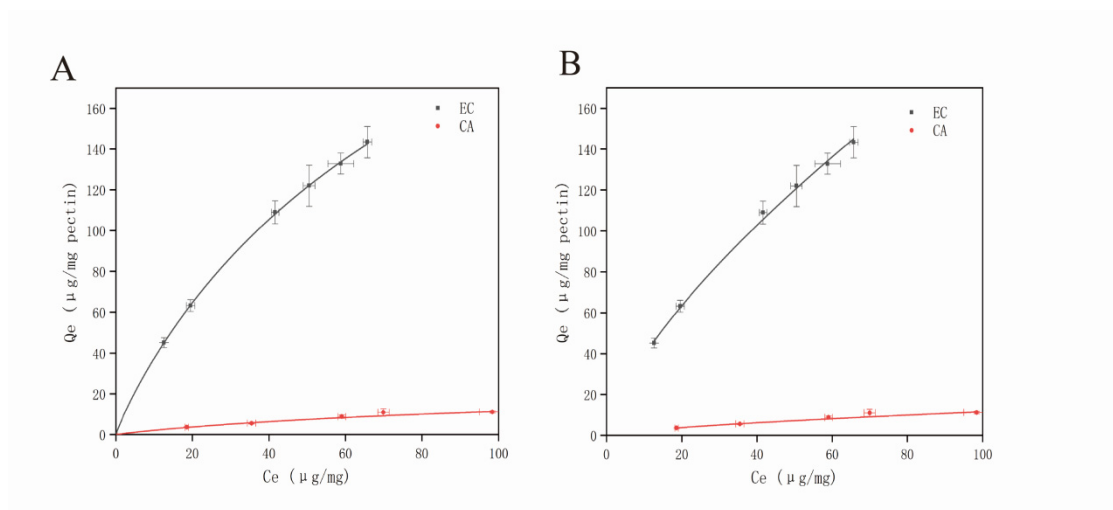

Figure S1. Adsorption curves of EC and CA on HP fitting by (A) Langmuir isotherm model and (B) Freundlich isotherm model.

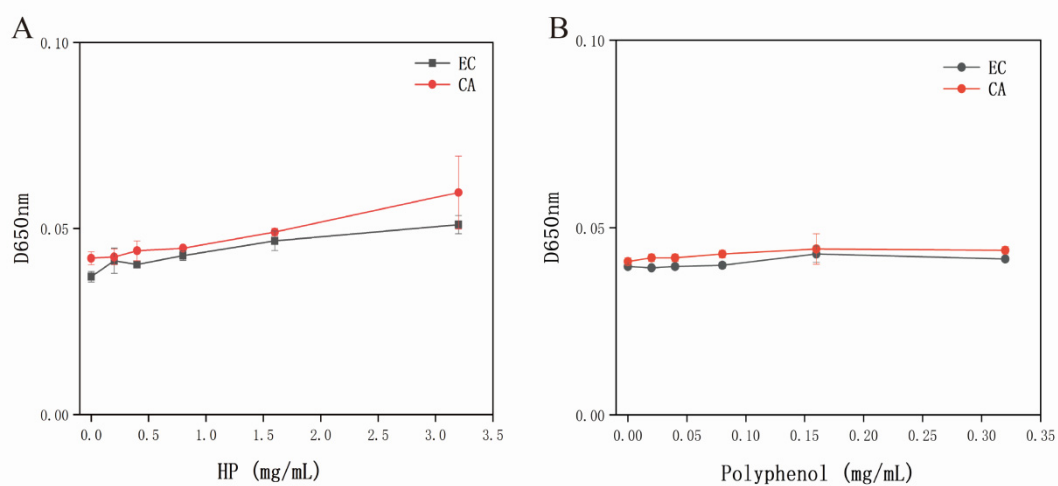

Figure S2. The turbidity characteristics of interaction between HP and polyphenols (EC and CA). The measure of absorbance at 650 nm after interactions in 0.1 M citrate/phosphate buffer pH 3.8 (in triplicate). (A) Variation of absorbance of HP at different concentrations with polyphenols (0.08 mg/mL). (B) Variation of absorbance of polyphenols at different concentrations with HP (0.4 mg/mL).

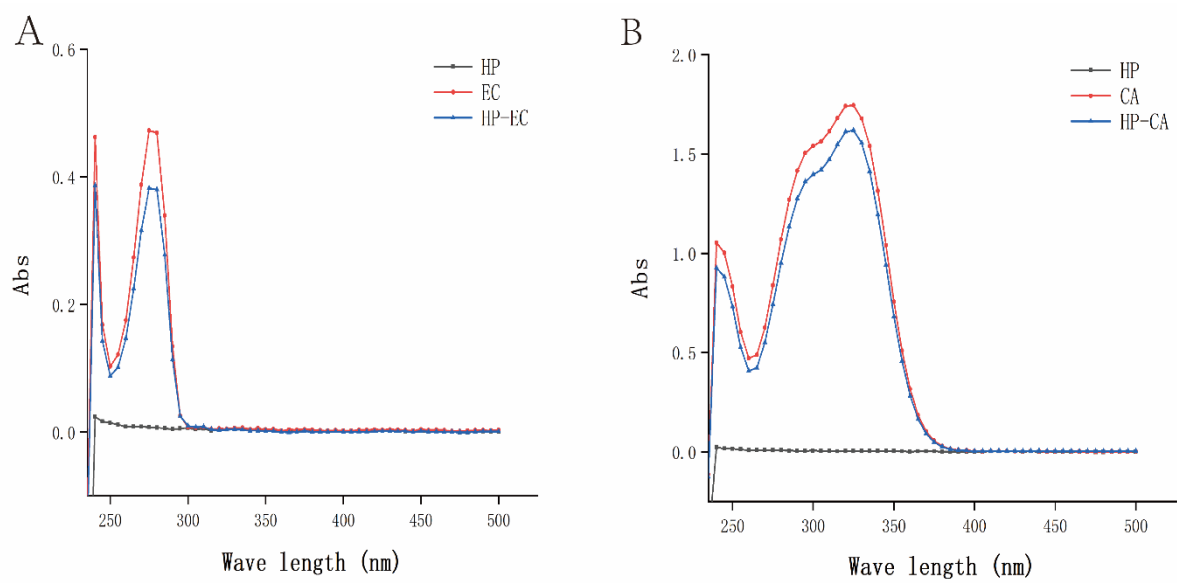

Figure S3. UV-VIS scanning results of HP, EC and HP-EC mixture (A); CA and HP-CA mixture (B).
